# Supplementary material for: Evolution and Current Status of Inﬂuenza A Virus in Chile: A Review
Source: Preprints.org preprint supplement (doi:10.20944/preprints202309.1224.v1), 2023-09-19
Supplement: Supplementary file 1 [file supplementary]

## Sheet: Sheet1
Accession	Lineage	Host	Subtype	Year
GU053038	A/chicken/Chile/184240-1/2002(H7N3)	Gallus gallus	H7N3	2002
CY015027	A/chicken/Chile/184240-4322/2002(H7N3)	Gallus gallus	H7N3	2002
KP003921	A/seagull/Chile/SAG14259/2007(H13N2)	Leucophaeus pipixcan	H13N2	2007
KF772948	A/wild bird/Chile/1805/2008(H5N9)	Larus dominicanus	H5N9	2008
KF772956	A/seagull/Chile/5775/2009(H13N9)	Leucophaeus pipixcan	H13N9	2009
GQ866225	A/turkey/Chile/28317-6504-3/2009(H1N1)	Meleagris gallopavo	H1N1	2009
KX101195	A/yellow-billed pintail/Chile/1/2012(H1N1)	Anas georgica	H1N1	2012
KX254920	A/yellow-billed pintail/Chile/7/2013(H4N6)	Anas georgica	H4N6	2013
KX101129	A/black-necked stilt/Chile/2/2013(H11N9)	Himantopus mexicanus	H11N9	2013
KX101133	A/Muscovy duck/Chile/3/2013(H12)	Cairina moschata	H12	2013
KX101146	A/red-fronted coot/Chile/5/2013(H3N6)	Fulica rufifrons	H3N6	2013
KX101159	A/yellow-billed pintail/Chile/6/2013(H4N6)	Anas georgica	H4N6	2013
KX101174	A/black-necked stilt/Chile/1/2013(H11N9)	Himantopus mexicanus	H11N9	2013
KX101180	A/yellow-billed teal/Chile/9/2013(H7N6)	Anas flavirostris	H7N6	2013
KX101204	A/yellow-billed teal/Chile/8/2013(H7N6)	Anas flavirostris	H7N6	2013
KX254925	A/yellow-billed pintail/Chile/10/2014(H7N3)	Anas georgica	H7N3	2014
KX254929	A/yellow-billed pintail/Chile/11/2014(H7N3)	Anas georgica	H7N3	2014
KX101199	A/yellow-billed teal/Chile/12/2014(H7N3)	Anas flavirostris	H7N3	2014
KX254927	A/yellow-billed teal/Chile/13/2014(H5)	Anas flavirostris	H5	2014
KX254928	A/Chiloe wigeon/Chile/17/2014(H5N2)	Mareca sibilatrix	H5N2	2014
KX264377	A/yellow-billed teal/Chile/20/2014(H5)	Anas flavirostris	H5	2014
KX101134	A/yellow-billed teal/Chile/19/2014(H5Nx)	Anas flavirostris	H5	2014
KX101141	A/yellow-billed teal/Chile/15/2014(H5Nx)	Anas flavirostris	H5	2014
KX101156	A/yellow-billed teal/Chile/21/2014(H8Nx)	Anas flavirostris	H8	2014
KX101161	A/yellow-billed teal/Chile/16/2014(H6Nx)	Anas flavirostris	H6	2014
KX101182	A/yellow-billed teal/Chile/14/2014(H5Nx)	Anas flavirostris	H5	2014
KX101188	A/kelp gull/Chile/18/2014(H13)	Larus dominicanus	H13	2014
KX101207	A/yellow-billed teal/Chile/22/2014(H5Nx)	Anas flavirostris	H5	2014
KY644150	A/mallard duck/Chile/C4079/2015(H1N1)	Anas platyrhynchos	H1N1	2015
KY644162	A/yellow-billed pintail/Chile/C2014/2015(H3N8)	Anas georgica	H3N8	2015
KY644177	A/yellow-billed pintail/Chile/C4256/2015(H10N1)	Anas georgica	H10N1	2015
KY644186	A/yellow-billed teal/Chile/C4126/2015(H1N1)	Anas flavirostris	H1N1	2015
KY644189	A/yellow-billed teal/Chile/C4131/2015(H1N1)	Anas flavirostris	H1N1	2015
KX185901	A/American oystercatcher/Chile/C1307/2015(H9N2)	Haematopus palliatus	H9N2	2015
KX185902	A/Chilean teal/Chile/C918/2015(H4N2)	Anas flavirostris	H4N2	2015
KX185908	A/yellow-billed pintail/Chile/C1267/2015(H5N3)	Anas georgica	H5N3	2015
KX185910	A/mallard/Chile/C948/2015(H4N2)	Anas platyrhynchos	H4N2	2015
KX185918	A/gray plover/Chile/C1313/2015(H9N7)	Pluvialis squatarola	H9N7	2015
MH134596	A/kelp gull/Chile/C10791/2016(H16N3)	Larus dominicanus	H16N3	2016
MH134602	A/mallard/Chile/C14590/2016(H9N2)	Anas platyrhynchos	H9N2	2016
MH134615	A/kelp gull/Chile/C10826/2016(H16N3)	Larus dominicanus	H16N3	2016
MH134637	A/kelp gull/Chile/C10779/2016(H16N3)	Larus dominicanus	H16N3	2016
MH134649	A/brown-hooded gull/Chile/C10256/2016(H13N2)	Chroicocephalus maculipennis	H13N2	2016
MH134650	A/kelp gull/Chile/C12508/2016(H13N2)	Larus dominicanus	H13N2	2016
MH134676	A/whimbrel/Chile/C12523/2016(H13N2)	Numenius phaeopus	H13N2	2016
MH134685	A/Franklin's gull/Chile/C10794/2016(H16N3)	Leucophaeus pipixcan	H16N3	2016
MH134689	A/brown-hooded gull/Chile/C15103/2016(H9N7)	Chroicocephalus maculipennis	H9N7	2016
MH134690	A/yellow-billed pintail/Chile/C14830/2016(H12N5)	Anas georgica	H12N5	2016
MH134702	A/Franklin's gull/Chile/C10784/2016(H16N3)	Leucophaeus pipixcan	H16N3	2016
MH134723	A/yellow-billed pintail/Chile/C13198/2016(H1N1)	Anas georgica	H1N1	2016
MH134728	A/kelp gull/Chile/C10579/2016(H16N3)	Larus dominicanus	H16N3	2016
MH134729	A/kelp gull/Chile/C12396/2016(H6N2)	Larus dominicanus	H6N2	2016
MH134739	A/whimbrel/Chile/C10834/2016(H13N2)	Numenius phaeopus	H13N2	2016
MH134779	A/yellow-billed pintail/Chile/C14719/2016(H7N3)	Anas georgica	H7N3	2016
MH134786	A/mallard/Chile/C14592/2016(H9N2)	Anas platyrhynchos	H9N2	2016
MH134823	A/brown-hooded gull/Chile/C10765/2016(H13N2)	Chroicocephalus maculipennis	H13N2	2016
MH134837	A/red shoveler/Chile/C14653/2016(H11N1)	Spatula platalea	H11N1	2016
MH134842	A/yellow-billed pintail/Chile/C14831/2016(H12N5)	Anas georgica	H12N5	2016
MH134855	A/mallard/Chile/C9763/2016(H6N8)	Anas platyrhynchos	H6N8	2016
MH134891	A/yellow-billed pintail/Chile/C9588/2016(H4N2)	Anas georgica	H4N2	2016
MH134908	A/kelp gull/Chile/C12395/2016(H6N2)	Larus dominicanus	H6N2	2016
MH134913	A/kelp gull/Chile/C10798/2016(H16N3)	Larus dominicanus	H16N3	2016
MH158636	A/upland goose/Chile/C10986/2016(H6N8)	Chloephaga picta	H6N8	2016
MH158642	A/dolphin gull/Chile/C10783/2016(H16N3)	Leucophaeus scoresbii	H16N3	2016
MH675632	A/red-gartered coot/Chile/C16030/2016(H3N4)	Fulica armillata	H3N4	2016
MH498637	A/yellow-billed teal/Chile/C20255/2016(H10N7)	Anas flavirostris	H10N7	2016
MH498647	A/Franklin's gull/Chile/C20061/2016(H13N9)	Leucophaeus pipixcan	H13N9	2016
MH498655	A/yellow-billed pintail/Chile/C19338/2016(H10N7)	Anas georgica	H10N7	2016
MH498656	A/whimbrel/Chile/C20106/2016(H13N9)	Numenius phaeopus	H13N9	2016
MH498668	A/whimbrel/Chile/C20075/2016(H13N9)	Numenius phaeopus	H13N9	2016
MH498671	A/white-backed stilt/Chile/C20090/2016(H13N9)	Himantopus melanurus	H13N9	2016
MH498680	A/yellow-billed teal/Chile/C8619/2016(H11N9)	Anas flavirostris	H11N9	2016
MH498698	A/kelp gull/Chile/C8939/2016(H13N2)	Larus dominicanus	H13N2	2016
MH498730	A/blackish oystercatcher/Chile/C20062/2016(H13N9)	Haematopus ater	H13N9	2016
MH498733	A/yellow-billed pintail/Chile/C19357/2016(H10N7)	Anas georgica	H10N7	2016
MH498752	A/black skimmer/Chile/C20084/2016(H13N9)	Rynchops niger	H13N9	2016
MH498778	A/black skimmer/Chile/C20057/2016(H13N8)	Rynchops niger	H13N8	2016
MH498793	A/Franklin's gull/Chile/C20069/2016(H13N9)	Leucophaeus pipixcan	H13N9	2016
MH498836	A/yellow-billed teal/Chile/C8711/2016(H11N9)	Anas flavirostris	H11N9	2016
MH498851	A/kelp gull/Chile/C20137/2016(H13N9)	Larus dominicanus	H13N9	2016
MH498862	A/kelp gull/Chile/C8602/2016(H13N2)	Larus dominicanus	H13N2	2016
MH498871	A/black skimmer/Chile/C20124/2016(H13N9)	Rynchops niger	H13N9	2016
MH498888	A/kelp gull/Chile/C8609/2016(H13N2)	Larus dominicanus	H13N2	2016
MH498904	A/brown-hooded gull/Chile/C8851/2016(H16N3)	Chroicocephalus maculipennis	H16N3	2016
MH498919	A/kelp gull/Chile/C8595/2016(H13N2)	Larus dominicanus	H13N2	2016
MH498930	A/Franklin's gull/Chile/C20070/2016(H13N9)	Leucophaeus pipixcan	H13N9	2016
MH498968	A/American oystercatcher/Chile/C17400/2016(H3N8)	Haematopus palliatus	H3N8	2016
MH498978	A/Franklin's gull/Chile/C17421/2016(H13N9)	Leucophaeus pipixcan	H13N9	2016
MH499009	A/whimbrel/Chile/C20144/2016(H13N9)	Numenius phaeopus	H13N9	2016
MH499011	A/elegant tern/Chile/C20085/2016(H13N9)	Thalasseus elegans	H13N9	2016
MH499019	A/black skimmer/Chile/C20123/2016(H13N9)	Rynchops niger	H13N9	2016
MH499035	A/American oystercatcher/Chile/C17359/2016(H3N8)	Haematopus palliatus	H3N8	2016
MH499037	A/brown-hooded gull/Chile/C10246/2016(H13N2)	Chroicocephalus maculipennis	H13N2	2016
MH499041	A/Franklin's gull/Chile/C20094/2016(H13N9)	Leucophaeus pipixcan	H13N9	2016
MH499057	A/Franklin's gull/Chile/C17422/2016(H13N9)	Leucophaeus pipixcan	H13N9	2016
MH499072	A/whimbrel/Chile/C20147/2016(H13N9)	Numenius phaeopus	H13N9	2016
MH499074	A/whimbrel/Chile/C9351/2016(H1N1)	Numenius phaeopus	H1N1	2016
MH499078	A/Franklin's gull/Chile/C20149/2016(H13N9)	Leucophaeus pipixcan	H13N9	2016
MH499091	A/American oystercatcher/Chile/C20102/2016(H13N9)	Haematopus palliatus	H13N9	2016
MH499098	A/Franklin's gull/Chile/C10242/2016(H6N2)	Leucophaeus pipixcan	H6N2	2016
MH499102	A/black skimmer/Chile/C20140/2016(H13N9)	Rynchops niger	H13N9	2016
MH499107	A/Franklin's gull/Chile/C20086/2016(H13N9)	Leucophaeus pipixcan	H13N9	2016
MH499127	A/black skimmer/Chile/C20077/2016(H13N9)	Rynchops niger	H13N9	2016
MH499132	A/Franklin's gull/Chile/C20118/2016(H13N9)	Leucophaeus pipixcan	H13N9	2016
MH499144	A/black skimmer/Chile/C20108/2016(H13N9)	Rynchops niger	H13N9	2016
MH499147	A/shorebird/Chile/C7037/2016(H13N2)	Charadriiformes	H13N2	2016
MH499154	A/cinnamon teal/Chile/C19368/2016(H3N8)	Anas cyanoptera	H3N8	2016
MH499155	A/Franklin's gull/Chile/C20110/2016(H13N9)	Leucophaeus pipixcan	H13N9	2016
MH499160	A/Franklin's gull/Chile/C20373/2016(H13N9)	Leucophaeus pipixcan	H13N9	2016
MH499177	A/elegant tern/Chile/C20093/2016(H13N9)	Thalasseus elegans	H13N9	2016
MH499186	A/kelp gull/Chile/C8594/2016(H13N2)	Larus dominicanus	H13N2	2016
MH499204	A/yellow-billed teal/Chile/C8620/2016(H11N9)	Anas flavirostris	H11N9	2016
MH499218	A/whimbrel/Chile/C20073/2016(H13N9)	Numenius phaeopus	H13N9	2016
MH499225	A/black skimmer/Chile/C20142/2016(H13N9)	Rynchops niger	H13N9	2016
MH499241	A/black skimmer/Chile/C20100/2016(H13N9)	Rynchops niger	H13N9	2016
MH499244	A/kelp gull/Chile/C8599/2016(H13N2)	Larus dominicanus	H13N2	2016
MH488109	A/yellow-billed teal/Chile/C8687/2016(H7N6)	Anas flavirostris	H7N6	2016
MF099262	A/gull/Arica/71/2016(H13N2)	Larus	H13N2	2016
KY644155	A/yellow-billed teal/Chile/C5750/2016(H12N5)	Anas flavirostris	H12N5	2016
KY644183	A/blackish oystercatcher/Chile/C6534/2016(H2N2)	Haematopus ater	H2N2	2016
OP888517	A/black skimmer/Chile/C26100/2017(H3N8)	Rynchops niger	H3N8	2017
OP888525	A/blackish oystercatcher/Chile/C26467/2017(H6N8)	Haematopus ater	H6N8	2017
OP888533	A/whimbrel/Chile/C22799/2017(H6N8)	Numenius phaeopus	H6N8	2017
OP888541	A/kelp gull/Chile/C25097/2017(H13N9)	Larus dominicanus	H13N9	2017
OP888548	A/whimbrel/Chile/C22749/2017(H6N8)	Numenius phaeopus	H6N8	2017
OP888564	A/kelp gull/Chile/C28937/2017(H13N8)	Larus dominicanus	H13N8	2017
OP888572	A/coscoroba swan/Chile/C25624/2017(H6N1)	Coscoroba coscoroba	H6N1	2017
OP888588	A/red-gartered coot/Chile/C25892/2017(H6N1)	Fulica armillata	H6N1	2017
OP888596	A/whimbrel/Chile/C22796/2017(H6N8)	Numenius phaeopus	H6N8	2017
OP888603	A/blackish oystercatcher/Chile/C26609/2017(H6N8)	Haematopus ater	H6N8	2017
OP888627	A/white-backed stilt/Chile/C21965/2017(H13N9)	Himantopus melanurus	H13N9	2017
OP888656	A/black-headed duck/Chile/C29675/2017(H11N9)	Heteronetta atricapilla	H11N9	2017
OP888672	A/coscoroba swan/Chile/C24321/2017(H6N1)	Coscoroba coscoroba	H6N1	2017
OP888679	A/kelpgull/Chile/C24014/2017(H13N9)	Larus dominicanus	H13N9	2017
OP888695	A/yellow-billed teal/Chile/C31271/2017(H11N9)	Anas flavirostris	H11N9	2017
OP888702	A/kelp gull/Chile/C21939/2017(H5N6)	Larus dominicanus	H5N6	2017
OP888741	A/yellow-billed teal/Chile/C31272/2017(H11N9)	Anas flavirostris	H11N9	2017
OP888787	A/yellow-billed teal/Chile/C31386/2017(H11N9)	Anas flavirostris	H11N9	2017
OP888803	A/yellow-billed teal/Chile/C29567/2017(H11N9)	Anas flavirostris	H11N9	2017
OP888842	A/yellow-billed pintail/Chile/C29580/2017(H11N9)	Anas georgica	H11N9	2017
OP888912	A/kelp gull/Chile/C33646/2017(H13N2)	Larus dominicanus	H13N2	2017
OP888919	A/Franklin's gull/Chile/C33636/2017(H13N2)	Leucophaeus pipixcan	H13N2	2017
OP888936	A/Franklin's gull/Chile/C21933/2017(H13N9)	Leucophaeus pipixcan	H13N9	2017
MZ005102	A/chinstrap penguin/Cape Shirreff/P36S/2017(H11N2)	Pygoscelis antarcticus	H11N2	2017
MZ005120	A/chinstrap penguin/Cape Shirreff/P19S/2017(H11N2)	Pygoscelis antarcticus	H11N2	2017
MK424168	A/Meleagris gallopavo/Valparaiso/890_5/2017(H7N6)	Meleagris gallopavo	H7N6	2017
MK424169	A/Meleagris gallopavo/Valparaiso/890-11/2017(H7N6)	Meleagris gallopavo	H7N6	2017
MK424170	A/Meleagris gallopavo/Valparaiso/890-12/2017(H7N6)	Meleagris gallopavo	H7N6	2017
MK424171	A/Meleagris gallopavo/Valparaiso/890-6/2017(H7N6)	Meleagris gallopavo	H7N6	2017
MK424172	A/Meleagris gallopavo/Valparaiso/10_2_10/2017(H7N6)	Meleagris gallopavo	H7N6	2017
MK424173	A/Meleagris gallopavo/Valparaiso/10_5_13/2017(H7N6)	Meleagris gallopavo	H7N6	2017
MK424174	A/Meleagris gallopavo/Valparaiso/11_2_22/2017(H7N6)	Meleagris gallopavo	H7N6	2017
MK424175	A/Meleagris gallopavo/Valparaiso/13_4_12/2017(H7N6)	Meleagris gallopavo	H7N6	2017
MK424176	A/Meleagris gallopavo/Valparaiso/22/2017(H7N6)	Meleagris gallopavo	H7N6	2017
MK163947	A/yellow-billed teal/Chile/C25813/2017(H7N6)	Anas flavirostris	H7N6	2017
MK163954	A/yellow-billed teal/Chile/C25814/2017(H7N6)	Anas flavirostris	H7N6	2017
MK163970	A/mallard duck/Chile/C23961/2017(H5N3)	Anas platyrhynchos	H5N3	2017
MK163984	A/yellow-billed teal/Chile/C24042/2017(H5N3)	Anas flavirostris	H5N3	2017
MK163999	A/yellow-billed pintail/Chile/C30974/2017(H3N8)	Anas georgica	H3N8	2017
MK164009	A/kelp gull/Chile/C35523/2017(H5N3)	Larus dominicanus	H5N3	2017
MK164010	A/yellow-billed pintail/Chile/C34473/2017(H3N8)	Anas georgica	H3N8	2017
MK167355	A/white-backed stilt/Chile/C24619/2017(H5N9)	Himantopus melanurus	H5N9	2017
MK045460	A/turkey/Chile/17-002742-9/2017(H7N6)	Meleagris gallopavo	H7N6	2017
MK045461	A/turkey/Chile/17-002742-4/2017(H7N6)	Meleagris gallopavo	H7N6	2017
MK045473	A/turkey/Chile/17-002742-8/2017(H7N6)	Meleagris gallopavo	H7N6	2017
MK045480	A/turkey/Chile/17-002745-1/2017(H7N6)	Meleagris gallopavo	H7N6	2017
MK045490	A/turkey/Chile/17-002742-3/2017(H7N6)	Meleagris gallopavo	H7N6	2017
MK045495	A/turkey/Chile/17-002745-2/2017(H7N6)	Meleagris gallopavo	H7N6	2017
MH498818	A/kelp gull/Chile/C27585/2017(H6N8)	Larus dominicanus	H6N8	2017
MH498857	A/yellow-billed pintail/Chile/C26936/2017(H1N9)	Anas georgica	H1N9	2017
MH499022	A/yellow-billed teal/Chile/C26822/2017(H1N9)	Anas flavirostris	H1N9	2017
MH499142	A/kelp gull/Chile/C27733/2017(H13N8)	Larus dominicanus	H13N8	2017
MH488110	A/yellow-billed teal/Chile/C26947/2017(H7N6)	Anas flavirostris	H7N6	2017
OP888556	A/blackish oystercatcher/Chile/C40194/2018(H6N8)	Haematopus ater	H6N8	2018
OP888580	A/kelp gull/Chile/C39002/2018(H13N2)	Larus dominicanus	H13N2	2018
OP888710	A/cinnamon teal/Chile/C38108/2018(H7N6)	Anas cyanoptera	H7N6	2018
OP888718	A/kelp gull/Chile/C41225/2018(H13N6)	Larus dominicanus	H13N6	2018
OP888725	A/yellow-billed pintail/Chile/C40431/2018(H2N1)	Anas georgica	H2N1	2018
OP888733	A/Franklin's gull/Chile/C42119/2018(H13N2)	Leucophaeus pipixcan	H13N2	2018
OP888765	A/Franklin's gull/Chile/C38092/2018(H13N2)	Leucophaeus pipixcan	H13N2	2018
OP888771	A/kelp gull/Chile/C41186/2018(H13N8)	Larus dominicanus	H13N8	2018
OP888850	A/kelp gull/Chile/C42093/2018(H13N2)	Larus dominicanus	H13N2	2018
OP888856	A/kelp gull/Chile/C41104/2018(H7N6)	Larus dominicanus	H7N6	2018
OP888864	A/kelp gull/Chile/C38401/2018(H6N1)	Larus dominicanus	H6N1	2018
OP888872	A/yellow-billed teal/Chile/C41203/2018(H4N3)	Anas flavirostris	H4N3	2018
OP888880	A/yellow-billed teal/Chile/C42541/2018(H6N1)	Anas flavirostris	H6N1	2018
OP888888	A/yellow-billed teal/Chile/C37436/2018(H13N2)	Anas flavirostris	H13N2	2018
OP888904	A/blackish oystercatcher/Chile/C38127/2018(H1N1)	Haematopus ater	H1N1	2018
OP888909	A/southern lapwing/Chile/C36480/2018(H13N8)	Vanellus chilensis	H13N8	2018
OP888915	A/kelp gull/Chile/C42985/2018(H6N2)	Larus dominicanus	H6N2	2018
OP888944	A/black-headed gull/Chile/C38075/2018(H3N8)	Chroicocephalus ridibundus	H3N8	2018
OP888952	A/kelp gull/Chile/C38396/2018(H6N1)	Larus dominicanus	H6N1	2018
OP888960	A/yellow-billed teal/Chile/C38424/2018(H13N8)	Anas flavirostris	H13N8	2018
OP888967	A/yellow-billed teal/Chile/C38402/2018(H13N2)	Anas flavirostris	H13N2	2018
OP888980	A/yellow-billed pintail/Chile/C42915/2018(H6N1)	Anas georgica	H6N1	2018
MN055195	A/chinstrap penguin/Antarctica/HP04/2018(H11N2)	Pygoscelis antarcticus	H11N2	2018
MZ707486	A/chicken/Rapa Nui/CT2170/2019(H6N1)	Gallus gallus	H6N1	2019
OQ820949	A/chilean flamingo/Chile/C52796/2020(H7N9)	Phoenicopterus chilensis	H7N9	2020
OR265539	A/Turkey vulture/Antofagasta/228252-1/2022(H5N1)	Cathartes aura	H5N1	2022
OR265542	A/Pelican/Tarapaca/227436-2/2022(H5N1)	Pelecanus	H5N1	2022
OR265549	A/Pelican/Antofagasta/228246-3/2022(H5N1)	Pelecanus	H5N1	2022
OR265573	A/Black-crowned night-heron/Antofagasta/228705-2/2022(H5N1)	Nycticorax nycticorax	H5N1	2022
OR125233	A/Pelican/Antofagasta/228246-2/2022(H5N1)	Pelecanus	H5N1	2022
OR125250	A/Sanderling/Arica y Parinacota/230758-1/2022(H5N1)	Calidris alba	H5N1	2022
OR125255	A/Elegant tern/Tarapaca/229133-1/2022(H5N1)	Thalasseus elegans	H5N1	2022
OR125279	A/Pelican/Atacama/230158-1/2022(H5N1)	Pelecanus	H5N1	2022
OR125285	A/Pelican/Antofagasta/228318-1/2022(H5N1)	Pelecanus	H5N1	2022
OR125312	A/Pelican/Atacama/229424-2/2022(H5N1)	Pelecanus	H5N1	2022
OR125340	A/Pelican/Atacama/229450-2/2022(H5N1)	Pelecanus	H5N1	2022
OR125345	A/Turkey vulture/Valparaiso/230187-1/2022(H5N1)	Cathartes aura	H5N1	2022
OR125356	A/Black-crowned night-heron/Antofagasta/228705-3/2022(H5N1)	Nycticorax nycticorax	H5N1	2022
OR125390	A/Elegant tern/Arica y Parinacota/229476-1/2022(H5N1)	Thalasseus elegans	H5N1	2022
OR125399	A/Pelican/Antofagasta/228272-1/2022(H5N1)	Pelecanus	H5N1	2022
OR125407	A/Pelican/Antofagasta/228244-2/2022(H5N1)	Pelecanus	H5N1	2022
OR125471	A/Pelican/Atacama/230158-2/2022(H5N1)	Pelecanus	H5N1	2022
OQ458189	A/Pelican/CHL/227023-1/2022(H5N1)	Pelecanus thagus	H5N1	2022
OQ455396	A/Pelican/CHL/226955-1/2022(H5N1)	Pelecanus thagus	H5N1	2022
OQ455401	A/Pelican/CHL/226955-3/2022(H5N1)	Pelecanus thagus	H5N1	2022
OQ455410	A/Pelican/CHL/226618-2/2022(H5N1)	Pelecanus thagus	H5N1	2022
OQ455416	A/Pelican/CHL/226618-1/2022(H5N1)	Pelecanus thagus	H5N1	2022
OQ455422	A/Pelican/CHL/226958-1/2022(H5N1)	Pelecanus thagus	H5N1	2022
OQ455437	A/Gull/CHL/227023-2/2022(H5N1)	Larus	H5N1	2022
OQ455442	A/Gull/CHL/227023-3/2022(H5N1)	Larus	H5N1	2022
OQ455458	A/Pelican/CHL/227087-1/2022(H5N1)	Pelecanus thagus	H5N1	2022
OQ455466	A/Pelican/CHL/226924-1/2022(H5N1)	Pelecanus thagus	H5N1	2022
OQ352548	A/black skimmer/Chile/C61962/2022(H5N1)	Rynchops niger	H5N1	2022
OQ352556	A/gray gull/Chile/C61947/2022(H5N1)	Leucophaeus modestus	H5N1	2022
OR268564	A/Whimbrel/Valparaiso/239946/2023(H5N1)	Numenius phaeopus	H5N1	2023
OR268570	A/Humboldt penguin/Tarapaca/238744-2/2023(H5N1)	Spheniscus humboldti	H5N1	2023
OR268598	A/Blackish oystercatcher/OHiggins/240628/2023(H5N1)	Haematopus ater	H5N1	2023
OR269134	A/chicken/OHiggins/241252-1/2023(H5N1)	Gallus gallus	H5N1	2023
OR269259	A/Whimbrel/Valparaiso/239946/2023(H5N1)	Numenius phaeopus	H5N1	2023
OR269264	A/Humboldt penguin/Tarapaca/238744-2/2023(H5N1)	Spheniscus humboldti	H5N1	2023
OR269268	A/Blackish oystercatcher/OHiggins/240628/2023(H5N1)	Haematopus ater	H5N1	2023
OR265569	A/Pelican/Valparaiso/233418-1/2023(H5N1)	Pelecanus	H5N1	2023
OR265587	A/Great egret/Araucania/240518/2023(H5N1)	Ardea alba	H5N1	2023
OR265608	A/Pelican/Coquimbo/230310-1/2023(H5N1)	Pelecanus	H5N1	2023
OR265639	A/Humboldt penguin/Coquimbo/239590/2023(H5N1)	Spheniscus humboldti	H5N1	2023
OR125135	A/Whimbrel/Coquimbo/239964/2023(H5N1)	Numenius phaeopus	H5N1	2023
OR125141	A/chicken/Nuble/240684/2023(H5N1)	Gallus gallus	H5N1	2023
OR125155	A/South American tern/Maule/238507/2023(H5N1)	Sterna hirundinacea	H5N1	2023
OR125162	A/Pelican/Valparaiso/234040/2023(H5N1)	Pelecanus	H5N1	2023
OR125175	A/chicken/Nuble/239136/2023(H5N1)	Gallus gallus	H5N1	2023
OR125180	A/Kelp gull/Maule/239349/2023(H5N1)	Larus dominicanus	H5N1	2023
OR125188	A/Sanderling/Arica y Parinacota/240265/2023(H5N1)	Calidris alba	H5N1	2023
OR125201	A/chicken/Nuble/240155/2023(H5N1)	Gallus gallus	H5N1	2023
OR125209	A/Black Skimmer/Maule/240379/2023(H5N1)	Rynchops niger	H5N1	2023
OR125214	A/chicken/Araucania/241914-1/2023(H5N1)	Gallus gallus	H5N1	2023
OR125219	A/Domestic duck/Araucania/241914-2/2023(H5N1)	Anas platyrhynchos	H5N1	2023
OR125238	A/Gray gull/Tarapaca/232825-1/2023(H5N1)	Leucophaeus modestus	H5N1	2023
OR125244	A/chicken/OHiggins/241252-3/2023(H5N1)	Gallus gallus	H5N1	2023
OR125269	A/Pelican/Valparaiso/233091-2/2023(H5N1)	Pelecanus	H5N1	2023
OR125292	A/Pelican/Valparaiso/233450-1/2023(H5N1)	Pelecanus	H5N1	2023
OR125296	A/Pelican/Coquimbo/231946-1/2023(H5N1)	Pelecanus	H5N1	2023
OR125301	A/chicken/Araucania/239569-2/2023(H5N1)	Gallus gallus	H5N1	2023
OR125307	A/Pelican/Maule/231155-2/2023(H5N1)	Pelecanus	H5N1	2023
OR125319	A/chicken/OHiggins/241252-6/2023(H5N1)	Gallus gallus	H5N1	2023
OR125322	A/Pelican/Valparaiso/233447-2/2023(H5N1)	Pelecanus	H5N1	2023
OR125328	A/chicken/OHiggins/241252-1/2023(H5N1)	Gallus gallus	H5N1	2023
OR125334	A/goose/Araucania/239189-1/2023(H5N1)	Anser sp.	H5N1	2023
OR125351	A/Turkey/Araucania/241892-3/2023(H5N1)	Meleagris gallopavo	H5N1	2023
OR125361	A/Chiloe wigeon/OHiggins/240893-2/2023(H5N1)	Mareca sibilatrix	H5N1	2023
OR125384	A/chicken/Nuble/241681-1/2023(H5N1)	Gallus gallus	H5N1	2023
OR125415	A/chicken/Nuble/241557-1/2023(H5N1)	Gallus gallus	H5N1	2023
OR125420	A/chicken/Araucania/239189-2/2023(H5N1)	Gallus gallus	H5N1	2023
OR125426	A/Pelican/Nuble/233947-2/2023(H5N1)	Pelecanus	H5N1	2023
OR125433	A/Turkey/Nuble/241568-1/2023(H5N1)	Meleagris gallopavo	H5N1	2023
OR125440	A/Domestic duck/Maule/240466-1/2023(H5N1)	Anas platyrhynchos	H5N1	2023
OR125446	A/chicken/Araucania/241892-2/2023(H5N1)	Gallus gallus	H5N1	2023
OR125452	A/Pelican/OHiggins/233663-1/2023(H5N1)	Pelecanus	H5N1	2023
OR125458	A/chicken/Araucania/239569-1/2023(H5N1)	Gallus gallus	H5N1	2023
OR125463	A/Turkey/Nuble/240489-1/2023(H5N1)	Meleagris gallopavo	H5N1	2023
OR125482	A/Pelican/Valparaiso/233091-1/2023(H5N1)	Pelecanus	H5N1	2023
OR125489	A/chicken/Araucania/240481-1/2023(H5N1)	Gallus gallus	H5N1	2023
OR125495	A/Domestic duck/Araucania/239189-3/2023(H5N1)	Anas platyrhynchos	H5N1	2023
OR125499	A/Domestic duck/Araucania/240481-2/2023(H5N1)	Anas platyrhynchos	H5N1	2023
OR125503	A/Pelican/OHiggins/233721-1/2023(H5N1)	Pelecanus	H5N1	2023
